# Supplementary material
Source: PubMed Central journal article supplement (PMC11156185)
Supplement: NEJMc2313517_appendix.pdf [file NEJMc2313517_appendix.pdf]

## Supplementary Appendix

Supplement to: Herbert C, McManus DD, Soni A. Persistent false positive Covid-19 rapid antigen tests. N Engl J Med 2024;390:764-5. DOI: 10.1056/NEJMc2313517

This appendix has been provided by the authors to give readers additional information about the work.

**Persistent False-positive COVID-19 Rapid Antigen Test Results May Be Caused by Cross-reactive Autoantigen: findings from the RADx Clinical Studies Core**

**Contents**

|                                          |   |
|------------------------------------------|---|
| <b>Supplemental Methods:</b> .....       | 2 |
| <b>Supplemental Figure</b> .....         | 3 |
| <b>Supplemental Table:</b> .....         | 4 |
| <b>Appendix 1: Acknowledgments</b> ..... | 5 |

**Supplemental Methods:**

*Molecular Testing:* Participants were asked to collect two anterior nasal swabs for paired Ag-RDT and RT-PCR testing every 48 hours for 15 days (Test Us at Home) or after symptom onset or close contact exposure (STOP COVID-19). One nasal swab was used to conduct an at-home Ag-RDT, and the other swab was placed in saline and shipped to Quest Diagnostics within 24 hours of collection for RT-PCR testing with Roche Cobas 6800 SARS-CoV-2 PCR.

*Rapid Antigen Testing:* Participants were instructed to complete testing with the provided Ag-RDT (Quidel QuickVue At-Home OTC COVID-19 Test, Abbott BinaxNOW COVID-19 Antigen Self Test, or BD Veritor™ At-Home COVID-19 Test) as per Emergency Use Authorization instructions. After administering the Ag-RDT, participants were asked to record Ag-RDT results (“Negative”, “Positive”, “Invalid”, or “Don’t Know”) in the study app. Participants also were asked to upload a photo of the used test strip to the app. Results from Ag-RDT were verified by a study coordinator using the uploaded photos. If the Ag-RDT result was invalid, participants were asked to perform one additional Ag-RDT. However, after two consecutive invalid Ag-RDT results, participants were not asked to complete additional Ag-RDT on that study day.

**Supplemental Figure:**

**Figure S1: COHORT Diagram for Identification of False Positive Individuals**

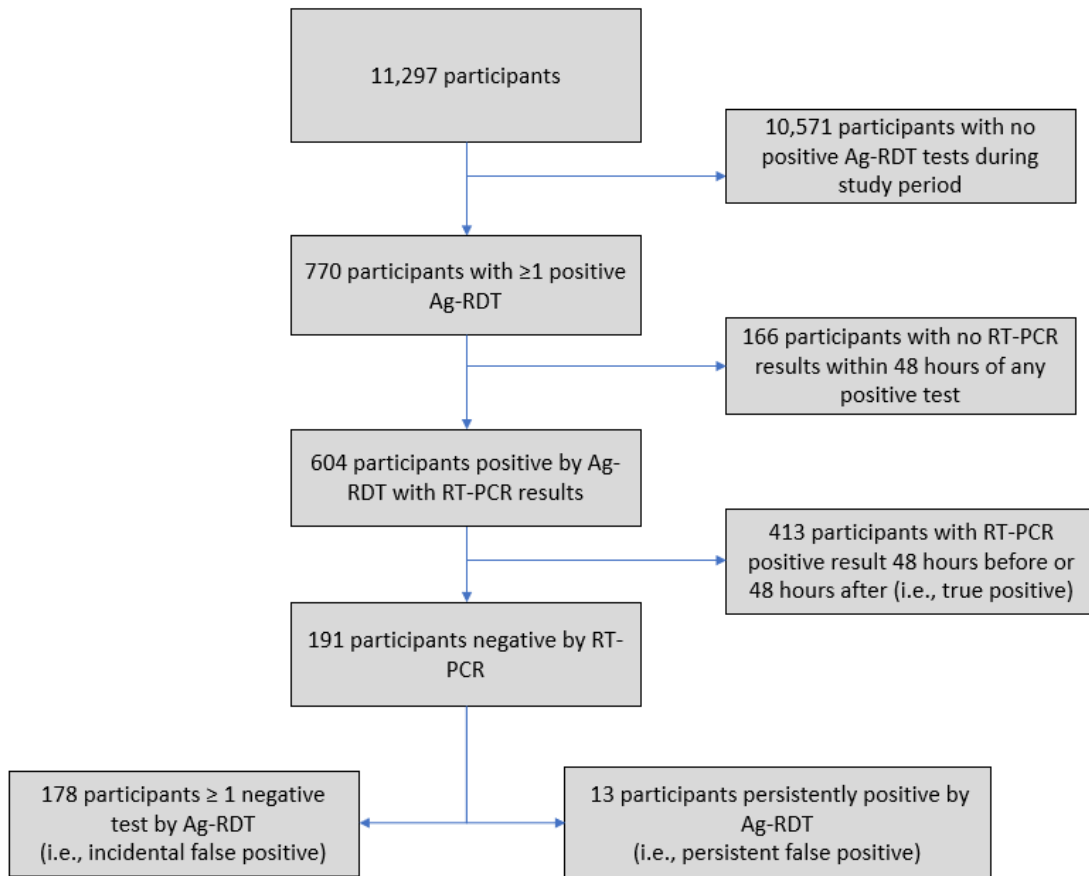

Ag-RDT: rapid antigen test; RT-PCR: reverse-transcriptase polymerase chain reaction

**Supplemental Table:**

**Table S1: Participant Demographics and Prevalence of Self-Reported Autoimmune Disease**

|                                                            | <b>Total Cohort<br/>N=11,289</b> |
|------------------------------------------------------------|----------------------------------|
| <b>RT-PCR positive for SARS-CoV-2: n (%)</b>               | 698 (6.2%)                       |
| <b>Vaccination Doses: n (%)</b>                            |                                  |
| 1                                                          | 536 (4.74%)                      |
| 2                                                          | 5,514 (48.8%)                    |
| 3+                                                         | 3,466 (30.7%)                    |
| Unvaccinated                                               | 1,310 (11.6%)                    |
| Don't know                                                 | 471 (4.16%)                      |
| <b>Age:</b>                                                |                                  |
| <18 years                                                  | 1,235 (10.9%)                    |
| 18-40 years                                                | 6,474 (57.3%)                    |
| 40-64 years                                                | 2,622 (23.2%)                    |
| ≥65 years                                                  | 966 (8.6%)                       |
| <b>Gender: n (%)</b>                                       |                                  |
| Woman                                                      | 7577 (67.1%)                     |
| Man                                                        | 3573 (31.6%)                     |
| Nonbinary                                                  | 10 (0.1%)                        |
| No answer                                                  | 137 (1.21%)                      |
| <b>Comorbidities: n (%)</b>                                |                                  |
| No comorbidities                                           | 7,364 (65.2%)                    |
| 1 comorbidity                                              | 2,448 (21.7%)                    |
| 2+ comorbidities                                           | 1,485 (13.2%)                    |
| <b>Self-reported autoimmune disease<sup>a</sup>: n (%)</b> | 347 (3.1%)                       |

<sup>a</sup> Represented autoimmune diseases include Celiac disease, rheumatoid arthritis, Grave's disease, Multiple sclerosis, Lupus, ankylosing spondylitis, Crohn's disease, ulcerative colitis, Hashimoto's thyroiditis, pernicious anemia, vitiligo, Sjogren's disease, and Wegner's disease. Excludes Type 1 Diabetes.

## Appendix 1: Acknowledgments

We are grateful to the RADx Clinical Studies Core (see table below), Test Us At Home study team, study participants, collaborators from the National Institute of Health (NIBIB and NHLBI), and Food and Drug Administration (Office of In Vitro Diagnostics and Radiological Health) for their involvement in the primary study. We would also like to thank Dr. Jonathan Kay for his input on the rheumatological impact of this work. We are thankful to the developers of the rapid antigen tests, who donated their tests for research use in this study. We are also thankful to county health departments across the country who helped with recruitment for this siteless study by spreading the word in their networks.

### RADx Clinical Studies Core Contributors:

| Name                      | Affiliation                                     |
|---------------------------|-------------------------------------------------|
| Chad Achenbach, MD MPH    | Northwestern University                         |
| Didem Ayturk, MS          | University of Massachusetts Chan Medical School |
| Bruce Barton, PhD         | University of Massachusetts Chan Medical School |
| Stephanie Behar, BA       | University of Massachusetts Chan Medical School |
| John Broach, MD, MPH, MBA | University of Massachusetts Chan Medical School |
| Lisa Cashman, MPH         | Quest Diagnostics                               |
| Andres Colubri, PhD       | University of Massachusetts Chan Medical School |
| Nisha Fahey, DO ScM       | University of Massachusetts Chan Medical School |
| Andreas Filippaios, MD    | University of Massachusetts Chan Medical School |
| Laura Gibson, MD          | University of Massachusetts Chan Medical School |
| Nathaniel Hafer, PhD      | University of Massachusetts Chan Medical School |
| Emma Harman, MPH          | CareEvolution, LLC                              |

---

|                         |                                                             |
|-------------------------|-------------------------------------------------------------|
| William Heetderks, PhD  | National Institute of Biomedical Imaging and Bioengineering |
| Vik Kheterpal, MD       | CareEvolution, LLC                                          |
| Peter Lazar, BS         | University of Massachusetts Chan Medical School             |
| Stephenie C. Lemon, PhD | University of Massachusetts Chan Medical School             |
| Honghuang Lin, PhD      | University of Massachusetts Chan Medical School             |
| Katherine Luzuriaga, MD | University of Massachusetts Chan Medical School             |
| Yukari C. Manabe, MD    | Johns Hopkins University School of Medicine                 |
| Robert Murphy, MD       | Northwestern University                                     |
| Chris Nowak, BA         | CareEvolution, LLC                                          |
| Laurel O'Connor, MD     | University of Massachusetts Chan Medical School             |
| Elizabeth Orvek, MS     | University of Massachusetts Chan Medical School             |
| Taylor Orwig, BS        | University of Massachusetts Chan Medical School             |
| Shishir Pandey, BE      | University of Massachusetts Chan Medical School             |
| Caitlin Pretz, MS       | University of Massachusetts Chan Medical School             |
| Lokinendi Rao, PhD      | Quest Diagnostics                                           |
| Matthew Robinson, MD    | Johns Hopkins University School of Medicine                 |
| Summer Schrader, BA     | CareEvolution, LLC                                          |
| Pamela Stamegna, MD     | University of Massachusetts Chan Medical School             |
| Thejas Suvarna, BBA, BS | CareEvolution, LLC                                          |

---

---

Seanan Tarrant, BS                      University of Massachusetts Chan Medical School

---

Biqi Wang, PhD                          University of Massachusetts Chan Medical School

---

Steven Wong, BA                        University of Massachusetts Chan Medical School

---

Colton Wright, MS                      University of Massachusetts Chan Medical School

---

Adrian Zai, MD PhD                    University of Massachusetts Chan Medical School

---

\*listed alphabetically
