# Supplementary material
Source: PubMed Central journal article supplement (PMC11156185)
Supplement: NEJMc2313517_disclosures.pdf [file NEJMc2313517_disclosures.pdf]

Carly Herbert

**Discloser Identifier:** 1111038

**Disclosure Purpose:** 23-13517

## Summary of Interests

I do not have any interests to disclose at this time.

## Additional Questions

1. **Are there other relationships or activities that readers could perceive to have influenced, or that give the appearance of potentially influencing, what you wrote in the submitted work?**

No.

2. **What is the manuscript title?**

Persistent False-Positive COVID-19 Rapid Antigen Test

3. **Are you the corresponding author?**

No.

## Certification

I certify that the information provided in this disclosure is complete and accurate.

Discloser Identifier: 439059

Disclosure Purpose: 23-13517

## Summary of Interests

### Company or Organization

| Entity                                                                                                                                       | Type                       | Interest Held By                                           |
|----------------------------------------------------------------------------------------------------------------------------------------------|----------------------------|------------------------------------------------------------|
| apple computer                                                                                                                               | Grant / Contract           | Self                                                       |
| <b>Recipient Name:</b><br><b>Grant / Contract Description:</b><br><b>Additional Information:</b>                                             |                            | <b>Recipient Type:</b><br><b>Grant / Contract Purpose:</b> |
| Avania                                                                                                                                       | Data And Safety Monitoring | Self                                                       |
| <b>Category:</b> Data And Safety Monitoring<br><b>Description:</b> Serve on DSMB for several studies<br><b>Additional Information:</b>       |                            |                                                            |
| Boehringer Ingelheim                                                                                                                         | Grant / Contract           | Self                                                       |
| <b>Recipient Name:</b><br><b>Grant / Contract Description:</b><br><b>Additional Information:</b>                                             |                            | <b>Recipient Type:</b><br><b>Grant / Contract Purpose:</b> |
| Bristol-Myers Squibb                                                                                                                         | Grant / Contract           | Self                                                       |
| <b>Recipient Name:</b> David McManus<br><b>Grant / Contract Description:</b> Grant for scientific projects<br><b>Additional Information:</b> |                            | <b>Recipient Type:</b><br><b>Grant / Contract Purpose:</b> |
| Bristol-Myers Squibb                                                                                                                         | Grant / Contract           | Self                                                       |
| <b>Recipient Name:</b><br><b>Grant / Contract Description:</b><br><b>Additional Information:</b>                                             |                            | <b>Recipient Type:</b><br><b>Grant / Contract Purpose:</b> |
| Bristol-Myers Squibb                                                                                                                         | Consultant                 | Self                                                       |
| <b>Category:</b> Consultant<br><b>Description:</b><br><b>Additional Information:</b>                                                         |                            |                                                            |
| Bristol-Myers Squibb                                                                                                                         | Consultant                 | Self                                                       |
| <b>Category:</b> Consultant<br><b>Description:</b><br><b>Additional Information:</b>                                                         |                            |                                                            |
| Fitbit                                                                                                                                       | Other                      | Self                                                       |
| <b>Category:</b> Other<br><b>Description:</b><br><b>Additional Information:</b>                                                              |                            |                                                            |

| Entity                                                                                               | Type                       | Interest Held By |
|------------------------------------------------------------------------------------------------------|----------------------------|------------------|
| Heart Rhythm Society                                                                                 | Other                      | Self             |
| <b>Category:</b> Other<br><b>Description:</b> Editor in Chief<br><b>Additional Information:</b>      |                            |                  |
| Heart Rhythm Society                                                                                 | Other                      | Self             |
| <b>Category:</b> Other<br><b>Description:</b><br><b>Additional Information:</b>                      |                            |                  |
| NAMSA                                                                                                | Data And Safety Monitoring | Self             |
| <b>Category:</b> Data And Safety Monitoring<br><b>Description:</b><br><b>Additional Information:</b> |                            |                  |
| Pfizer                                                                                               | Grant / Contract           | Self             |
| <b>Recipient Name:</b><br><b>Grant / Contract Description:</b><br><b>Additional Information:</b>     |                            |                  |
| <b>Recipient Type:</b><br><b>Grant / Contract Purpose:</b>                                           |                            |                  |
| Pfizer                                                                                               | Consultant                 | Self             |
| <b>Category:</b> Consultant<br><b>Description:</b><br><b>Additional Information:</b>                 |                            |                  |
| Philips                                                                                              | Grant / Contract           | Self             |
| <b>Recipient Name:</b><br><b>Grant / Contract Description:</b><br><b>Additional Information:</b>     |                            |                  |
| <b>Recipient Type:</b><br><b>Grant / Contract Purpose:</b>                                           |                            |                  |

## Intellectual Property

| Type                                                                                                                                           | Is Licensed | Interest Held By |
|------------------------------------------------------------------------------------------------------------------------------------------------|-------------|------------------|
| Copyright - Heart Rhythm Society Editor in Chief                                                                                               | -           | Self             |
| <b>Description:</b> Heart Rhythm Society Editor in Chief<br><b>Filing Jurisdiction:</b><br><b>Licensees:</b><br><b>Additional Information:</b> |             |                  |
| <b>Copyright Number:</b><br><b>Copyright Holder:</b>                                                                                           |             |                  |

## Additional Questions

1. Are there other relationships or activities that readers could perceive to have influenced, or that give the appearance of potentially influencing, what you wrote in the submitted work?

No.

2. What is the manuscript title?

Persistent False-Positive COVID-19 Rapid Antigen Test

**3. Are you the corresponding author?**

No.

## Certification

I certify that the information provided in this disclosure is complete and accurate.

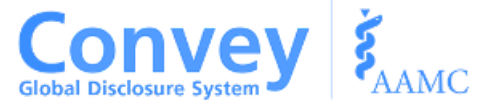

Apurv Soni

**Discloser Identifier:** 629778

**Disclosure Purpose:** 23-13517

## Summary of Interests

I do not have any interests to disclose at this time.

## Additional Questions

1. **Are there other relationships or activities that readers could perceive to have influenced, or that give the appearance of potentially influencing, what you wrote in the submitted work?**

No.

2. **What is the manuscript title?**

Persistent False-Positive COVID-19 Rapid Antigen Test

3. **Are you the corresponding author?**

Yes.

- a. **Please list the other authors' names here.**

Carly Herbert, David D McManus

## Certification

I certify that the information provided in this disclosure is complete and accurate.
